# Supplementary material for: Epigenetic Landscape Is Largely Shaped by Diversiform Transposons in Aegilops tauschii
Source: MDPI journal article supplement (doi:10.3390/ijms24119349), 2023-05-27
Supplement: s1 [file s1]

**Table S1.** List and catalog of histone antibodies used in this study.

| No. | Antibody | Source    | Catalog N° | Host/Isotype | Clonality  | Format   |
|-----|----------|-----------|------------|--------------|------------|----------|
| 1   | CENH3    | CWBio     | Zhang lab  | Rabbit IgG   | Polyclonal | Serum    |
| 2   | H2Bub    | Médimabs  | MM-0029    | Mouse IgG2a  | Monoclonal | Purified |
| 3   | H3       | Abcam     | ab1791     | Rabbit IgG   | Polyclonal | Purified |
| 4   | H3K18ac  | Abcam     | ab1191     | Rabbit IgG   | Polyclonal | Purified |
| 5   | H3K27ac  | Millipore | 07-360     | Rabbit IgG   | Polyclonal | Serum    |
| 6   | H3K27me1 | Millipore | 07-448     | Rabbit IgG   | Polyclonal | Purified |
| 7   | H3K27me2 | Abcam     | ab24684    | Rabbit IgG   | Polyclonal | Purified |
| 8   | H3K27me3 | Millipore | 07-449     | Rabbit IgG   | Polyclonal | Purified |
| 9   | H3K36me2 | Abcam     | ab9049     | Rabbit IgG   | Polyclonal | Purified |
| 10  | H3K36me3 | Abcam     | ab9050     | Rabbit IgG   | Polyclonal | Purified |
| 11  | H3K4me1  | Millipore | 07-436     | Rabbit IgG   | Polyclonal | Purified |
| 12  | H3K4me2  | Millipore | 07-030     | Rabbit IgG   | Polyclonal | Serum    |
| 13  | H3K4me3  | Millipore | 07-473     | Rabbit IgG   | Polyclonal | Purified |
| 14  | H3K56ac  | Abcam     | ab71956    | Rabbit IgG   | Polyclonal | Purified |
| 15  | H3K9ac   | Millipore | 07-352     | Rabbit IgG   | Polyclonal | Serum    |
| 16  | H3K9me2  | Abcam     | ab1220     | Mouse IgG2a  | Monoclonal | Purified |
| 17  | H3K9me3  | Abcam     | ab8898     | Rabbit IgG   | Polyclonal | Purified |
| 18  | H4K20me1 | Millipore | 07-748     | Rabbit IgG   | Polyclonal | Purified |
| 19  | H4K5ac   | Millipore | 07-327     | Rabbit IgG   | Polyclonal | Serum    |

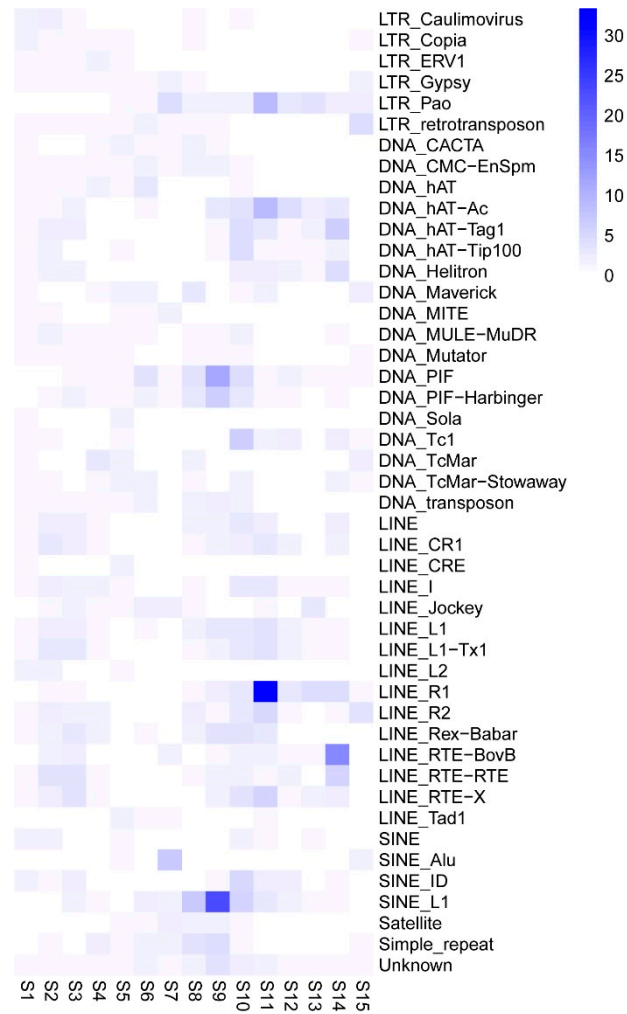

**Figure S1.** The heatmap represents the fold enrichments of TEs of different superfamilies in chromatin states.

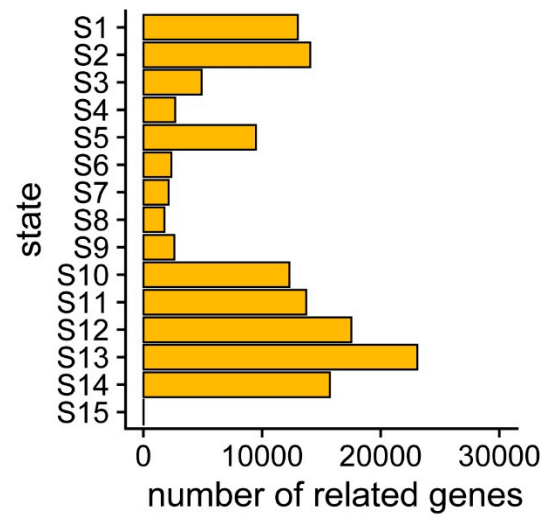

**Figure S2.** The bar chart represents the number of related genes in the chromatin states.

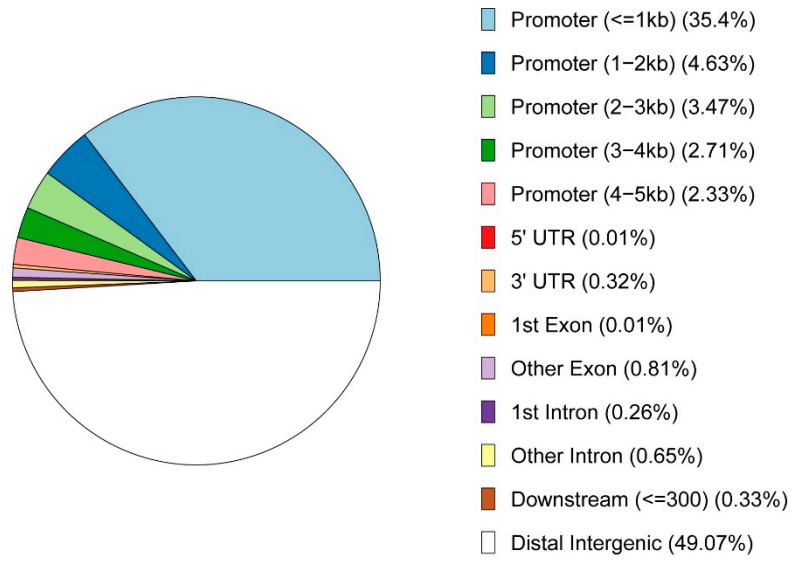

**Figure S3.** The pie chart shows the distribution of MNase HSs in the AL8/78 genome.

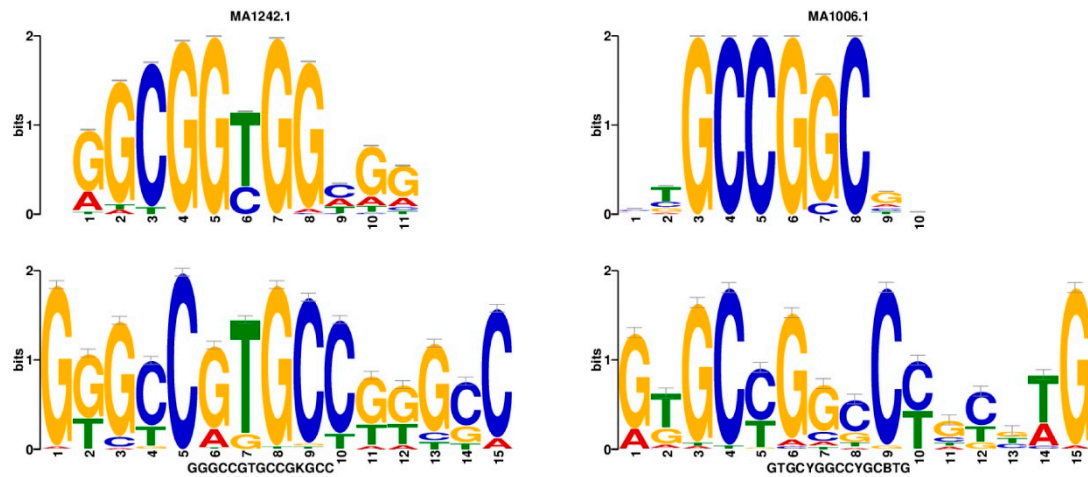

**Figure S4.** The diagrams show similarities between the known transcription factor-binding motifs of the ERF/DREB family in *Arabidopsis* (upper diagram) and the motifs found in hAT-Ac TE-HSs in *Ae. tauschii* (lower diagram). The motif similarities were searched and quantified by Tomtom software from JASPAR (NON-REDUNDANT) CORE plants database (Wasserman and Sandelin, 2004). The motifs in *Arabidopsis* were previously reported by O'Malley et al., 2016 and Weirauch et al., 2014.

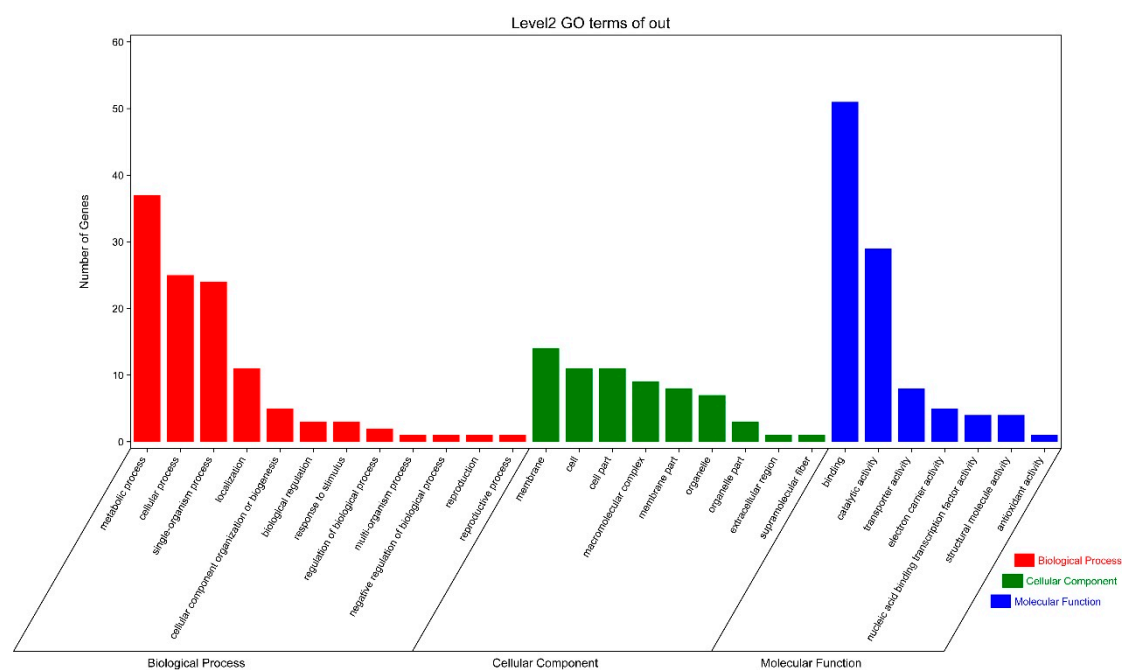

**Figure S5.** The top enriched GO terms of proximal TE-HS related genes.

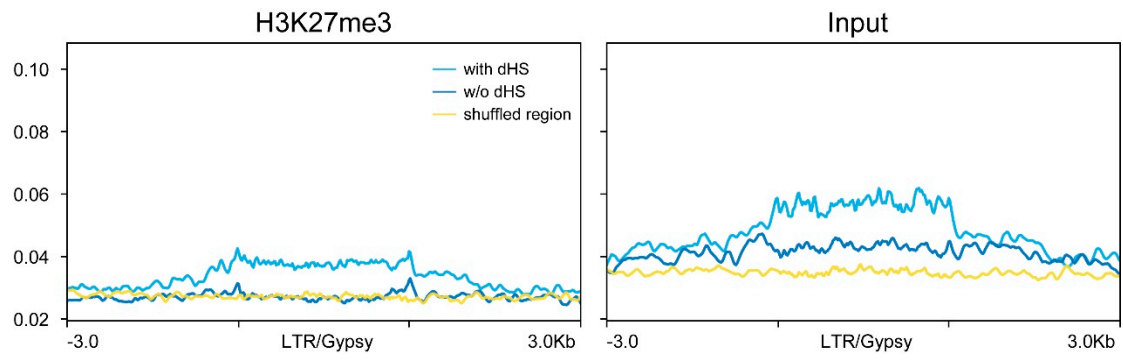

**Figure S6.** The profiles show H3K27me3 and Input distributions around LTR/Gypsy with or without dHS. Shuffled genomic regions are used as control.

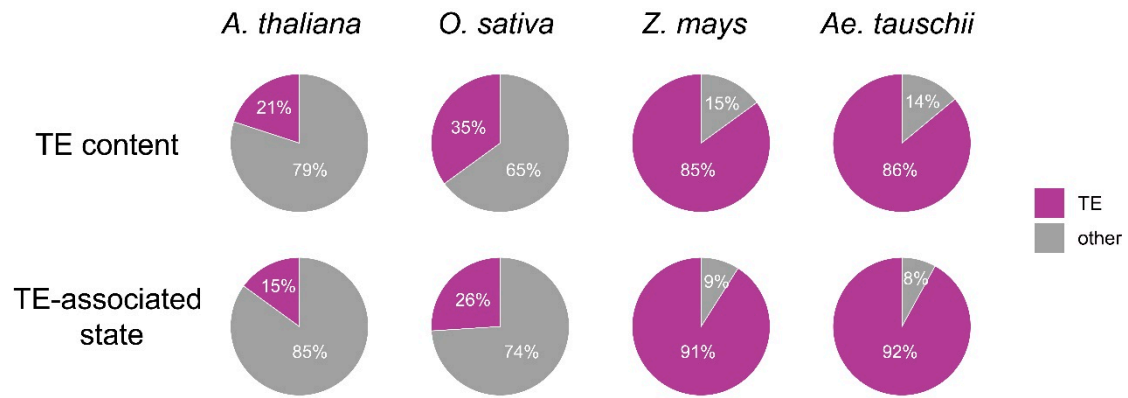

**Figure S7.** The pie charts show the percentage of TEs in the genome (top) and the percentage of TE-associated chromatin states in all chromatin states (bottom) in *Arabidopsis thaliana*, *Oryza sativa*, *Zea mays*, and *Aegilops tauschii*, respectively. The chromatin state data used in this study for *A. thaliana*, *O. sativa*, and *Z. mays* was obtained from the Plant Chromatin State Database (PCSD) constructed by Liu et al., 2018, a study collected public and in-house plant epigenomic data sets and applied a Hidden Markov Model to define chromatin states.
